# Supplementary material for: Arl13b and the exocyst interact synergistically in ciliogenesis
Source: PubMed Central journal article supplement — Mol Biol Cell. 2016 Jan 15;27(2):308–20. doi: 10.1091/mbc.E15-02-0061 (PMC4713133; doi:10.1091/mbc.e15-02-0061), 2016-01-15
Supplement: supp_E15-02-0061v1_CombinedSupMats.pdf [file supp_E15-02-0061v1_CombinedSupMats.pdf]

# Supplemental Materials

*Molecular Biology of the Cell*

Seixas et al.

**SUPPLEMENTARY FIGURES**

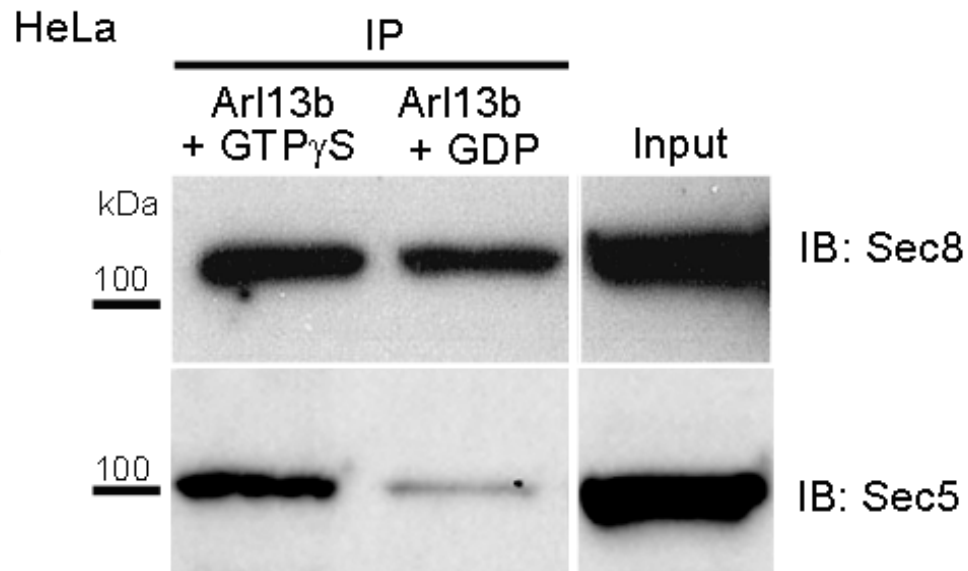

**Supplementary Figure 1: Sec5 and Sec8 interact with Arl13b in non-ciliated HeLa cells.** Cell lysates from HeLa were immunoprecipitated with Arl13b antibody in the presence of GTP $\gamma$ S or GDP. Immunoprecipitates were analyzed by SDS-PAGE and immunoblotted with Sec5 or Sec8 antibodies.

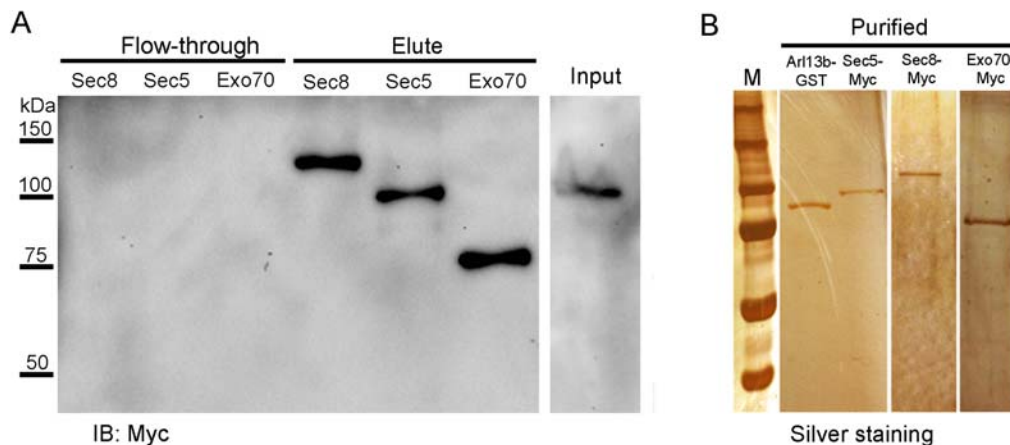

**Supplementary Figure 2: Purification of Myc-tagged exocyst subunits produced *in vitro*, by affinity chromatography.** (A) Anti-Myc-coupled agarose beads were incubated with identical amounts of *in vitro*-translated proteins. Eluted products and the flow through were analyzed by SDS-PAGE followed by immunoblotting with Myc antibody. Five percent of the *in-vitro* translated material used on the affinity chromatography was run as input. (B) Silver staining of eluted products from (A) and purified Arl13b-GST, showing the purity of the samples.

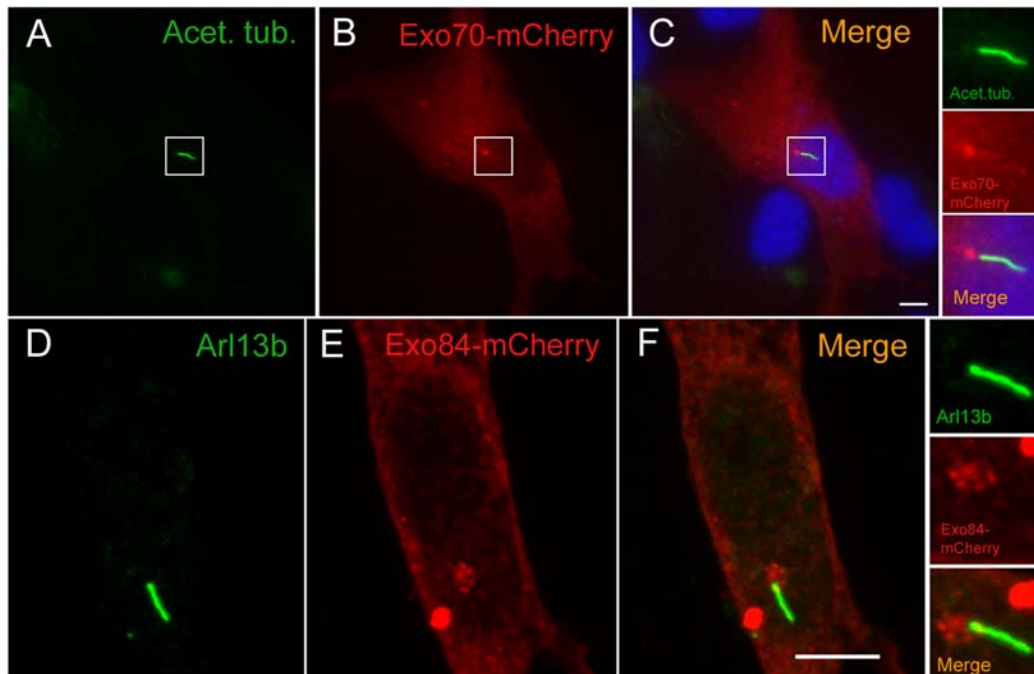

**Supplementary Figure 3: Exo70 and Exo84 localize to the periciliary region.** (A-C) In RPE1 cells, Exo70-mCherry localizes to the base of the cilium, marked by acetylated  $\alpha$ -tubulin (green). Inset shows a higher magnification of this region. (D-F) In NIH-3T3 cells, Exo84-mCherry localizes to the base of the cilium, marked by Arl13b (green). A higher magnification of the periciliary region is shown. Scale bar: 10  $\mu$ m (A-C) and 5  $\mu$ m (D-F).

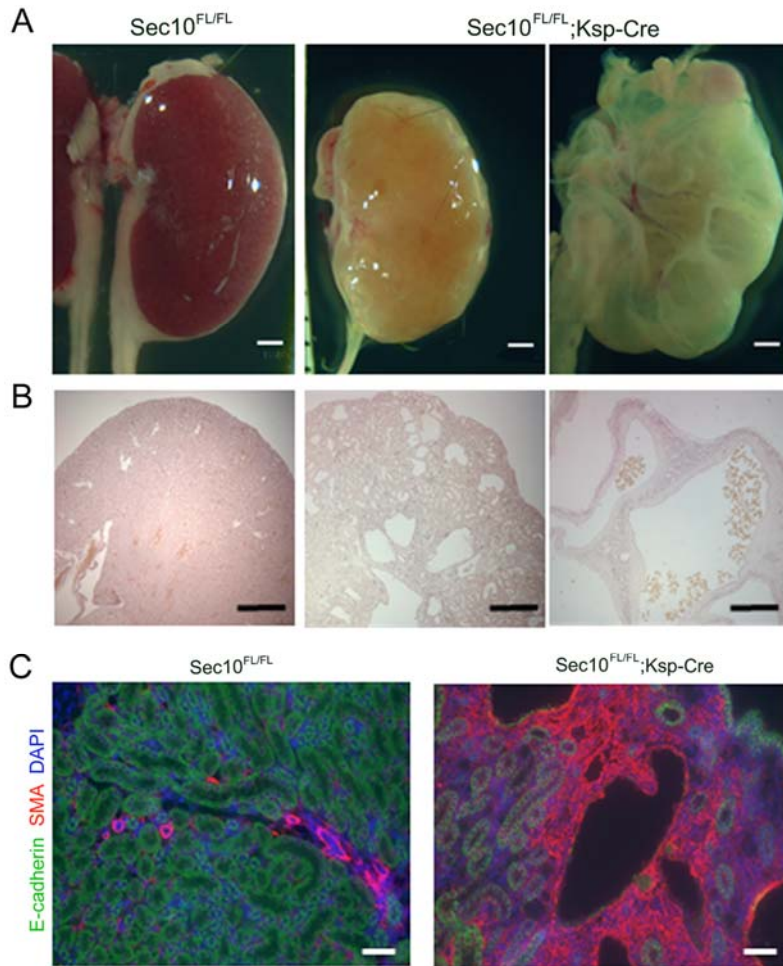

**Supplementary Figure 4: Kidney-specific *Sec10* conditional knockout results in a variable polycystic phenotype.** (A) Images of *Sec10*<sup>FL/FL</sup> control and *Sec10*<sup>FL/FL</sup>;Ksp-Cre conditional knockout adult mouse kidneys demonstrate the phenotypic spectrum of *Sec10* depletion. Scale bar: 1 mm. (B) Hematoxylin-eosin staining of *Sec10* conditional knockout kidneys reveals cystic kidney phenotypes compared to controls. Scale bar: 200 μm. (C) Alpha-Smooth muscle actin (SMA, red) and E-cadherin (green) staining of adult kidneys demonstrate a dramatically increased level of SMA expression, a marker of fibrogenesis, in *Sec10*<sup>FL/FL</sup>;Ksp-Cre knockout kidneys compared to controls. Scale bar: 50 μm.
